# Supplementary material for: Covalent Plasmodium falciparum-selective proteasome inhibitors exhibit a low propensity for generating resistance in vitro and synergize with multiple antimalarial agents
Source: PLOS journal article supplement (doi:10.1371/journal.ppat.1007722), 2019-06-06
Supplement: S3 (10.1371/journal.ppat.1007722.s003) [file journal.ppat.1007722.s003]

**S1 Table. Geographic origin and drug resistance genotypes of *Plasmodium falciparum* lines.**

| Parasite <sup>a</sup>        | Edited <sup>b</sup> | Original ID | Source       | Parental line (year) | K13   | <i>pfcr</i> <sup>c</sup> | <i>pfmdr1</i> | CN <sup>d</sup> | <i>dhfr</i> <sup>e</sup> |
|------------------------------|---------------------|-------------|--------------|----------------------|-------|--------------------------|---------------|-----------------|--------------------------|
| Cam3.II K13 <sup>WT</sup>    | Yes <sup>f</sup>    |             | Fidock lab   | W. Cambodia (2010)   | WT    |                          |               |                 |                          |
| Cam3.II K13 <sup>R539T</sup> | No <sup>g</sup>     | RF 967      | R. Fairhurst |                      | R539T | Dd2                      | Y184F         | 1               | Triple                   |
| Cam3.II K13 <sup>C580Y</sup> | Yes                 |             | Fidock lab   |                      | C580Y |                          |               |                 |                          |
| V1/S K13 <sup>WT</sup>       | Yes <sup>h</sup>    |             | Fidock lab   | Vietnam (1976)       | WT    |                          |               |                 |                          |
| V1/S K13 <sup>R539T</sup>    | Yes                 | V1/S        | Fidock lab   |                      | R539T | Dd2                      | N86Y          | 1               | Quad                     |
| V1/S K13 <sup>C580Y</sup>    | Yes                 |             | Fidock lab   |                      | C580Y |                          |               |                 |                          |

<sup>a</sup>Parasite lines were previously reported by Straimer *et al.* (2015, *Science* ).

<sup>b</sup>Zinc-finger nucleases were used to generate gene-edited parasites expressing the wild-type (WT) or mutant alleles along with binding-site mutations.

<sup>c</sup>Dd2: M74I/N75E/K76T/A220S/Q271E/N326S/I356T/R371I.

<sup>d</sup>CN, *pfmdr1* copy number.

<sup>e</sup>Triple, N51I/C59R/S108N; Quad, quadruple N51I/C59R/S108N/I164L.

<sup>f</sup>Cam3.II K13<sup>R539T</sup> parental line reverted to the WT allele. Previously denoted Cam3.II<sup>rev</sup> in Straimer *et al.*

<sup>g</sup>Unedited parental line bearing the K13 R539T allele.

<sup>h</sup>Editing control. V1/S parasite bearing the K13 WT allele plus zinc-finger binding-site mutations.
